1 Current substance use patterns and associated factors among Ghanaian adolescents in senior  
2 high school

3

4

5 Rachael Asantewaa Darko<sup>1,2</sup>, Franklin N. Glozah<sup>1\*</sup>

6

7

8 <sup>1</sup> Department of Social and Behavioural Sciences, School of Public Health, University of  
9 Ghana

10

11 <sup>2</sup> Food and Drugs Authority, Accra, Ghana

12

13

14 \*Corresponding author

15

16 Email: fglozah@ug.edu.gh (FNG)

17

18 **Abstract**

19

20 Substance use poses a significant threat to adolescent health and well-being globally, with  
21 rising rates of concern in developing countries. Understanding the specific factors currently  
22 driving substance use among youth is crucial for developing targeted interventions. This study  
23 examines current substance use patterns and their correlates among Ghanaian in-school  
24 adolescents. A cross-sectional survey was administered to a random sample of 425 SHS  
25 students in Accra. A standardised questionnaire was used to assess substance use patterns  
26 (types, frequency, age of initiation), peer and family influences, socio-demographic  
27 characteristics and potential substance dependence. Descriptive statistics were used to  
28 characterize the sample and a multiple logistic regression models identified predictors of use  
29 for specific substances. The mean age of participants was 17.1 years. Cigarettes were the most  
30 used substance, followed by shisha, marijuana, and alcohol. Male students, those living with  
31 relatives, and those with friends who drink alcohol were more likely to use alcohol. Students  
32 who worked while in school, or had family members who smoke, had an increased likelihood  
33 of cigarette use. Older students and those with friends who use shisha were more likely to use  
34 shisha. Interestingly, limited social media exposure and living with parents and siblings were  
35 associated with lower marijuana use. Additionally, the results showed a potential substance  
36 dependence in some students. This study highlights substance use patterns and influential  
37 factors among adolescents in urban Ghana. Findings emphasize the interaction of peer  
38 influence, family environment, and gender in shaping substance use behaviours. These insights  
39 can inform culturally sensitive interventions to promote adolescent health and resilience in  
40 Ghana, and potentially other developing contexts.

41

42 **Keywords:** Substance use; Adolescents; Ghana; Risk factors

43 **Introduction**

44 Adolescent substance use has emerged as a critical global public health challenge, with a notable  
45 surge observed in developing countries (1). The consumption of alcohol, tobacco products, and  
46 illicit substances is a widespread phenomenon across all demographics, with adolescents  
47 exhibiting particularly high prevalence rates (2). Defined as any chemical compound that, upon  
48 administration or ingestion, alters psychological processes including perception, consciousness,  
49 cognition, mood, and emotions (3), these substances pose significant risks to adolescent health and  
50 well-being.

51  
52 Substance use, defined as the non-medical and non-scientific use of controlled psychoactive  
53 substances (4), was historically associated with urban environments. However, recent research  
54 indicates a shift in this pattern. Substance use, including illicit drugs and alcohol, is now observed  
55 across diverse socioeconomic and educational backgrounds, including school-aged children (5,6),  
56 contradicting previous assumptions.

57  
58 Evolving societal and economic factors have contributed to a rise in substance use, with notable  
59 trends including polydrug use and increased tobacco consumption among adolescent girls (7).  
60 These findings highlight the need for updated public health strategies. Substance abuse,  
61 encompassing the excessive consumption of illicit drugs, prescription and over-the-counter  
62 medications, and alcohol, poses a significant global health challenge. Recent data reveals a  
63 concerning rise in drug use worldwide, with 275 million users reported in the past year, a 22%  
64 increase from 2010. Projections indicate an 11% global increase by 2030, with Africa expected to

65 experience a disproportionate 40% surge. In 2019 alone, drug use resulted in approximately half a  
66 million deaths and the loss of 18 million years of healthy life (8).

67

68 Adolescents are particularly vulnerable to substance abuse, with studies in Africa highlighting a  
69 high prevalence linked to various physical and psychosocial issues. This vulnerability is  
70 exacerbated by the fact that adolescence is a critical period of brain development, making young  
71 people more susceptible to the detrimental effects of these substances (9–11).

72

73 Alcohol consumption is another major concern, contributing to 3 million deaths annually and a  
74 substantial global disease burden (12). In Sub-Saharan Africa, tobacco and alcohol are the most  
75 prevalent substances used by adolescents, with an overall substance use prevalence of 41.6%  
76 (Jumbe et al., 2021). Tobacco use alone claims over 8 million lives each year, making it a leading  
77 cause of preventable death worldwide (12). The COVID-19 pandemic has further amplified the  
78 issue of substance abuse, particularly among young people (13). Increased stress, isolation, and  
79 disruptions to daily life have contributed to a rise in substance use as a coping mechanism (7).

80

81 Substance abuse has far-reaching negative consequences, including impaired mental function,  
82 increased risk of mental health disorders and dependence, unemployment, cancers, and other  
83 health problems (14). These effects extend to families and communities, causing psychological  
84 distress, economic strain, and increased healthcare costs. Given the existing burden of disease and  
85 socio-political challenges in Sub-Saharan Africa, the escalating substance abuse crisis demands  
86 urgent attention. It is imperative to address this issue before it reaches a critical point, as the  
87 consequences for individuals, families, and society are devastating.

88

89 The global prevalence of substance use and abuse is on the rise, with the World Drug Report  
90 projecting an 11% increase in drug users by 2030 due to demographic shifts, and it is expected to  
91 be more pronounced in Africa, where the younger population, more prone to drug use, is  
92 proportionally larger (United Nations Office on Drugs and Crime, 2021). Substance abuse  
93 significantly contributes to the loss of disability-adjusted life years (DALYs) in young people  
94 worldwide, with African rates 2.5 times higher than in high-income countries (Castelpietra et al.,  
95 2022). While research on substance use is established, evolving trends such as experimentation  
96 with mixing substances, volatile inhalant use, and the discovery of novel intoxicants necessitate  
97 ongoing investigation into this issue (Ogundipe et al., 2018).

98

99 Ghana has not been immune to the escalating problem of substance use. There is a concerning  
100 increase in drug trafficking and consumption in the region over the past decade, impacting security,  
101 governance, and development (15). In recent years, Ghana, like other African nations, has  
102 witnessed a rise in substance use among youth, including tobacco, alcohol, and marijuana  
103 (11,14,16). The 2012 Global School-Based Student Health Survey (GSHS) found that 8.3% of  
104 students smoked cigarettes, 15.4% consumed alcohol, and 9.4% reported past-month intoxication,  
105 with 94.3% of smokers initiating before age 14 (17).

106

107 Substance use is particularly prevalent in Senior High Schools (18,19). While cigarette smoking  
108 remains the most common form of tobacco use, waterpipe tobacco smoking (WTS), or shisha, is  
109 increasingly popular among adolescents, particularly females, due to misconceptions about its  
110 harmfulness compared to cigarettes (20,21). The consequences of substance abuse are severe,

111 ranging from immune system suppression and infectious diseases to cardiovascular complications  
112 and mortality.

113

114 Research studies have found a correlation between energy drink consumption and substance use  
115 among adolescents, including alcohol, tobacco, cannabis, and non-medical prescription drugs (22).

116 In response, the Food and Drugs Authority (FDA) has launched the "DAABI CAMPAIGN" aimed  
117 at raising awareness about substance abuse in SHS (21).

118

119 Intrapersonal, interpersonal, and societal factors can all contribute to adolescent substance abuse.

120 Intrapersonal factors, such as knowledge and perception of substance use risks and self-esteem,

121 significantly influence adolescent engagement with substances (23). Interpersonal relationships,

122 especially with peers and family members who exhibit substance use patterns, are a critical risk

123 factor for adolescents (24,25). Specifically, strained parent-child relationships, especially for girls,

124 are associated with increased alcohol and marijuana use (26,27).

125

126 Social factors, such as peer influence, family history of substance abuse, and community norms,

127 play a substantial role in adolescent substance use initiation and escalation (25). Research indicates

128 a strong correlation between adolescent alcohol use and the alcohol use patterns of their peers (17).

129 Furthermore, parental substance abuse is a significant risk factor for adolescent substance use,

130 contributing to exposure to adverse childhood experiences and increasing the likelihood of

131 developing substance use issues (28).

132

133 The accessibility and availability of substances within the community, influenced by local and

134 national regulations and policies, can either facilitate or inhibit adolescent substance use (29).

135 Furthermore, media representations of substance use also significantly impact adolescents, serving  
136 as a primary source of information and potentially normalizing substance use behaviours (30,31).

137

138 Several additional factors can increase adolescent vulnerability to substance use, including  
139 experimentation, lack of knowledge, inadequate parental supervision, peer and family pressure,  
140 gang involvement, mental health issues, truancy, and academic difficulties (25). Adolescents may  
141 initiate substance use due to a variety of reasons, such as stress relief, curiosity, or lack of  
142 awareness regarding the consequences for themselves and others. Strained family relationships  
143 and poor communication can also contribute to adolescent dissatisfaction and substance use as a  
144 coping mechanism (28).

145

146 Previous research in Ghana has documented the use of alcohol, tobacco, and other substances  
147 among adolescents, but there remains a need for updated, context-specific data to inform effective  
148 prevention and intervention strategies. Accra's status as the national educational and economic  
149 centre means that findings from this study have the potential to inform policy and practice not only  
150 within the city but also across the country.

151

152 By focusing on in-school adolescents in Accra, this study aims to shed light on the current patterns  
153 of substance use, identify the key correlates and risk factors, and contribute to a deeper  
154 understanding of the complex interplay of individual, social, and environmental factors influencing  
155 substance use among this vulnerable population.

156

157 This study seeks to examine the correlates of substance use among SHS students and examine  
158 current trends and patterns in relation to socio-demographic and psycho-social circumstances. This

159 knowledge is crucial for informing comprehensive interventions and treatment programmes for  
160 adolescents.

161

## 162 **Methods**

### 163 **Study Design**

164 A quantitative cross-sectional survey was conducted among Senior High School (SHS) students  
165 within the Accra Metropolitan Area (AMA), Greater Accra Region, Ghana. The AMA is one of  
166 26 Metropolitan, Municipal, and District Assemblies (MMDAs) within the Greater Accra Region  
167 (GAR). Educational oversight within the AMA falls under the jurisdiction of the Accra  
168 Metropolitan Education Office (AMEO) of the Ghana Education Service (GES).

169

170 Accra, the capital of Ghana and the site of this study, presents a dynamic and complex landscape  
171 for examining substance use among in-school adolescents. As a rapidly urbanizing city, Accra  
172 grapples with social, economic, and educational disparities that may influence adolescent  
173 behaviour. The city's diverse population includes various ethnic groups (Ga, Akan, Ewe), religious  
174 affiliations (Christian, Muslim, Traditional), and socioeconomic levels, creating a multifaceted  
175 context for substance use patterns.

176

177 The Ghanaian education system in Accra consists of public and private schools with varying levels  
178 of resources and quality. While education is highly valued in Ghanaian culture, challenges such as  
179 overcrowding, limited infrastructure, and varying teaching standards persist. These factors,



180 coupled with the pressures of academic expectations and social influences, may contribute to the  
181 vulnerability of some adolescents to substance use.

182

### 183 **Population and sample**

184 The study population consisted of students attending public Senior High Schools (SHS) within the  
185 Accra Metropolitan Area (AMA). Inclusion criteria encompassed all SHS Form 1 and 2 students  
186 present on the day of data collection who expressed willingness to participate. Exclusion criteria  
187 included students who were unwell or absent from school on the data collection day. Two public  
188 schools were randomly selected from a total of five eligible institutions to participate in the study.

189 Sample size determination was calculated utilizing Cochran's formula for categorical data:

$$190 \quad n = \frac{Z^2 \times p(1-p)}{d^2}$$

$$191 \quad d^2$$

192 Where p = proportion of substance use among adolescents 45.6% (32)

193  $z^2 = 95\%$  confidence interval corresponding to the value of 1.96

194  $d^2 =$  proportion of sampling error tolerated at 0.05% (to increase the accuracy).

$$195 \quad n = \frac{1.96^2 \times 0.456 (1-0.456)}{0.05^2}$$

$$196 \quad 0.05^2$$

$$197 \quad n = 381.19$$

198 Assuming a non-response rate of about 10%,  $382 \times 0.1 = 38.2$ , the actual sample  
199 size is  $382 + 39 = 421$ . Therefore, the minimum sample size was 421. This methodology ensured  
200 a representative sample of the target population, allowing for generalizable conclusions regarding  
201 the research objectives.

202

203 Participant selection was achieved through a multi-stage sampling approach.

204 Initially, two schools were randomly chosen from a pool of five potential institutions.  
205 Subsequently, within each selected school, classes were randomly selected from the  
206 comprehensive list of available classes. Finally, a systematic sampling method was employed  
207 within each chosen class to identify the requisite number of student participants. Data collection  
208 was limited to students in Senior High School (SHS) year 1 and year 2, as SHS 3 students had  
209 already completed their academic year at the time of data collection. Data collection took place  
210 from 12<sup>th</sup> January 2023 to 23<sup>rd</sup> February 2023.

211

## 212 **Measures**

213 A structured questionnaire consisting of several sections was designed to address the research  
214 objectives. The first section gathered demographic information, including age, gender,  
215 socioeconomic status, and educational level, to characterize the sample population.

216

217 The second section explored the availability and accessibility of five substances prevalent in the  
218 region: alcohol, cigarettes, shisha, and marijuana (wee)f. Participants indicated whether they had  
219 encountered each substance in their environment and assessed the ease of obtaining each on a five-  
220 point Likert scale ranging from "very easy" to "very difficult." This section also investigated the  
221 primary sources from which adolescents obtained these substances, such as friends, family  
222 members, or illicit vendors. Additionally, participants reported the contexts in which they were  
223 most likely to use these substances, including social gatherings, after-school hours, or during  
224 periods of stress.

225

226 The third section delved into the assessment of substance use patterns and potential dependence  
227 among the adolescent participants. The CAGE-AID Substance Abuse Screening Tool, a validated  
228 instrument comprising questions related to alcohol and drug use, was employed for this purpose.  
229 The tool serves as an initial screening mechanism, identifying individuals who may require further  
230 evaluation for substance use disorders. Item responses were scored dichotomously, with a  
231 cumulative score of two or greater suggesting a potential need for intervention.

232

233 In addition to substance use, the study also examined self-esteem as a potential contributing factor  
234 to substance use behaviours. The Rosenberg Self-esteem Scale, a widely used 10-item uni-  
235 dimensional scale, was administered to assess participants' global self-worth. The scale captures  
236 both positive and negative feelings about oneself, providing a comprehensive evaluation of self-  
237 esteem levels. Responses were recorded on a four-point Likert scale and subsequently scored using  
238 a combined rating method, where higher scores signified greater self-esteem.

### 239 **Statistical analysis**

240 Data were exported to Stata version 16.1 for cleaning, processing, and analysis. A two-pronged  
241 analytical approach was employed, incorporating both difference-in-proportions and inferential  
242 analyses. To assess differences in proportions, Pearson's chi-square ( $\chi^2$ ) test was utilized, with  
243 Fisher's exact test substituted in cases where any  $2 \times 2$  table cell frequency was less than 5%.  
244 Inferential analysis was conducted via logistic regression, employing both univariate and  
245 multivariate approaches. Regression models were estimated using a 95% confidence interval, with  
246 a p-value  $< 0.05$  denoting statistical significance. This sequential approach allowed for initial  
247 identification of significant proportional differences, followed by quantification of the association  
248 strength through logistic regression. Substance use dependence was assessed descriptively using

249 the CAGE–AID Substance Abuse Screening Tool. A "yes" response to two or more of the four  
250 CAGE-AID questions was indicative of potential substance dependence.

251

## 252 **Ethical considerations**

253

254 Ethical clearance for this study was obtained from the Ghana Health Service Ethics Review  
255 Committee (GHS-ERC: 025/09/22). Furthermore, permission was granted by the Accra Metro  
256 Education Office of the Ghana Education Service and the respective heads of the Senior High  
257 Schools involved in participant recruitment. For participants under the age of 18, both written  
258 parental consent and participant assent were prerequisites for study enrolment. All participants  
259 received thorough information regarding the study's objectives, procedures, and potential risks and  
260 benefits, enabling informed decision-making about their participation. The study adhered to strict  
261 anonymity, confidentiality, and privacy protocols. All adolescent participants provided voluntary  
262 informed consent.

## 263 **Results**

### 264 **Socio-demographic characteristics of participants**

265 A total of 425 adolescents and young adults participated in the study. Participants were primarily  
266 female, with a slight majority in SHS 1. Most participants identified as Christian, while a minority  
267 identified as Muslim. Living arrangements were diverse, with participants living with their  
268 mothers, both parents, both parents and siblings, relatives, or alone. A notable proportion of  
269 participants reported working while still attending school. Demographic details of the sample are  
270 presented in Table 1.

271 Table 1. Socio-demographic characteristics of participants

| <b>Socio-demographic</b> | <b>Frequency</b> | <b>Percentage</b> |
|--------------------------|------------------|-------------------|
| <b>Age group</b>         |                  |                   |
| ≤16                      | 126              | 30.00             |

|     |                               |            |       |
|-----|-------------------------------|------------|-------|
| 272 | 17+                           | 294        | 70.00 |
|     | <b>Total</b>                  | <b>420</b> |       |
| 273 | <b>Sex</b>                    |            |       |
|     | Male                          | 182        | 42.92 |
| 274 | Female                        | 242        | 57.08 |
|     | <b>Total</b>                  | <b>424</b> |       |
| 275 | <b>Form</b>                   |            |       |
| 276 | SHS 1                         | 238        | 56.13 |
|     | SHS 2                         | 186        | 43.87 |
|     | <b>Total</b>                  | <b>424</b> |       |
| 277 | <b>Religious affiliation</b>  |            |       |
|     | Christian                     | 357        | 85.61 |
| 278 | Muslim                        | 60         | 14.39 |
|     | <b>Total</b>                  | <b>417</b> |       |
| 279 | <b>Living with</b>            |            |       |
|     | Only father                   | 38         | 9.11  |
| 280 | Only mother                   | 119        | 28.54 |
|     | Both parents                  | 114        | 27.34 |
| 281 | Both parents and siblings     | 95         | 22.78 |
|     | Relatives                     | 46         | 11.03 |
| 282 | Live alone                    | 5          | 1.20  |
|     | <b>Total</b>                  | <b>417</b> |       |
| 283 | <b>Working</b>                |            |       |
|     | No                            | 303        | 71.97 |
| 284 | Yes                           | 118        | 28.03 |
|     | <b>Total</b>                  | <b>421</b> |       |
| 285 | <b>Source of pocket money</b> |            |       |
|     | Parents                       | 315        | 75.54 |
| 286 | Guardians                     | 58         | 13.91 |
|     | From working                  | 39         | 9.35  |
| 287 | Gift                          | 5          | 1.20  |
|     | <b>Total</b>                  | <b>417</b> |       |

288

## 289 **Types and sources of substances used**

290 The primary source of all substances for participants was friends. This was followed by drug  
291 dealers, then online retailers and markets, with schools being the least common source. For alcohol  
292 specifically, friends were the most frequent source, followed by drug peddlers, online retailers,  
293 and markets, with schools being the least common. Shisha was primarily obtained from friends,  
294 with drug peddlers as a secondary source. Marijuana users also mainly sourced their supply from

295 friends, followed by drug peddlers and markets. Cigarettes were primarily obtained from friends  
 296 as well. Table 2 contains detailed statistics on the frequency of each source.

297

298 Table 2. Types and sources of substances used

| Type of Substance | Source of substance use |                   |                     |                  |                   | Total      |
|-------------------|-------------------------|-------------------|---------------------|------------------|-------------------|------------|
|                   | School                  | Friends           | Online/social media | Market           | Drug peddlers     |            |
|                   | n(%)                    | n(%)              | n(%)                | n(%)             | n(%)              | n          |
| Alcohol (n=79)    | 17(21.52)               | 66(83.54)         | 32(40.51)           | 30(37.97)        | 57(72.15)         | <b>202</b> |
| Cigarette (n=16)  | 3(20.00)                | 12(80.00)         | 5(33.33)            | 4(26.67)         | 8(53.33)          | <b>32</b>  |
| Shisha (n=51)     | 9(17.65)                | 45(88.24)         | 17(33.33)           | 13(25.49)        | 30(58.82)         | <b>114</b> |
| Marijuana (n=30)  | 3(10.00)                | 24(80.00)         | 5(16.67)            | 9(30.00)         | 20(66.67)         | <b>61</b>  |
| <b>Total</b>      | <b>32(18.18)</b>        | <b>147(83.52)</b> | <b>59(33.52)</b>    | <b>56(31.82)</b> | <b>115(65.34)</b> | <b>409</b> |

299

300

301 **Personal characteristics, social and intrapersonal factors, and alcohol use**

302 The prevalence of alcohol use among participants was 19.4% (n=79). Univariate analysis  
 303 identified several factors potentially associated with alcohol use. However, multivariate logistic  
 304 regression (Table 3) revealed that only sex, living situation, and peer influence remained  
 305 significantly associated with alcohol use.

306

307 Specifically, males were 1.88 times more likely to use alcohol than females (AOR=1.88, 95% CI:  
 308 1.04-3.40, p=0.036). Living with relatives was associated with a decreased likelihood of alcohol  
 309 use (AOR=0.22, 95% CI: 0.05-0.95, p=0.043), while having friends who use alcohol increased the  
 310 likelihood of use by 2.34 times (AOR=2.34, 95% CI: 1.03-5.32, p=0.043).

Table 3. Personal characteristics, social and intrapersonal factors, and alcohol use

| Socio-demographic                                       | Alcohol use   |               | $\chi^2$ (p-value) | Logistic Regression    |                       |
|---------------------------------------------------------|---------------|---------------|--------------------|------------------------|-----------------------|
|                                                         | No=336(80.96) | Yes=79(19.04) |                    | cOR[95%CI]p-value      | aOR[95%CI]p-value     |
|                                                         | n(%)          | n(%)          |                    |                        |                       |
| <b>Age group (n=411)</b>                                |               |               |                    |                        |                       |
| ≤16                                                     | 102(82.26)    | 22(17.74)     | 0.25(0.617)        | <b>ref</b>             | <b>ref</b>            |
| 17+                                                     | 230(80.14)    | 57(19.86)     |                    | 1.15[0.67-1.98]0.617   | 1.10[0.60-2.01]0.769  |
| <b>Sex (n=414)</b>                                      |               |               |                    |                        |                       |
| Female                                                  | 203(85.65)    | 34(14.35)     | 8.05(0.005)**      | <b>ref</b>             | <b>ref</b>            |
| Male                                                    | 132(74.58)    | 45(25.42)     |                    | 2.04[1.24-3.35]0.005** | 1.88[1.04-3.40]0.036* |
| <b>Form (n=414)</b>                                     |               |               |                    |                        |                       |
| SHS 2                                                   | 156(86.67)    | 24(13.33)     | 6.32(0.012)*       | <b>ref</b>             | <b>ref</b>            |
| SHS 1                                                   | 180(76.92)    | 54(23.08)     |                    | 1.95[1.15-3.30]0.013*  | 1.75[0.97-3.14]0.063  |
| <b>Religious affiliation (n=408)</b>                    |               |               |                    |                        |                       |
| Muslim                                                  | 53(88.33)     | 7(11.67)      | 2.53(0.112)        | <b>ref</b>             | <b>ref</b>            |
| Christian                                               | 277(79.6)     | 71(20.4)      |                    | 1.94[0.85-4.46]0.118   | 1.34[0.55-3.23]0.517  |
| <b>Whom do you live with (n=408)</b>                    |               |               |                    |                        |                       |
| Only father                                             | 29(76.32)     | 9(23.68)      | 11.61(0.040)*      | <b>ref</b>             | <b>ref</b>            |
| Only mother                                             | 85(74.56)     | 29(25.44)     |                    | 1.10[0.47-2.60]0.829   | 0.92[0.38-2.25]0.862  |
| Both parents                                            | 98(85.96)     | 16(14.04)     |                    | 0.53[0.21-1.32]0.170   | 0.53[0.20-1.37]0.188  |
| Both parents and siblings                               | 72(79.12)     | 19(20.88)     |                    | 0.85[0.34-2.10]0.725   | 0.82[0.31-2.14]0.680  |
| Relatives                                               | 43(93.48)     | 3(6.52)       |                    | 0.22[0.06-0.90]0.035*  | 0.22[0.05-0.95]0.043* |
| Live alone                                              | 5(100)        | 0(0.0)        |                    | -                      | -                     |
| <b>Working apart from schooling (n=412)</b>             |               |               |                    |                        |                       |
| No                                                      | 246(82.83)    | 51(17.17)     | 2.75(0.097)        | <b>ref</b>             | <b>ref</b>            |
| Yes                                                     | 87(75.65)     | 28(24.35)     |                    | 1.55[0.92-2.62]0.099   | 1.00[0.49-2.06]0.999  |
| <b>Where participant get pocket money from? (n=408)</b> |               |               |                    |                        |                       |
| Parents                                                 | 253(82.14)    | 55(17.86)     | 8.28(0.041)*       | <b>ref</b>             | <b>ref</b>            |
| Guardians                                               | 49(85.96)     | 8(14.04)      |                    | 0.75[0.34-1.68]0.485   | 1.00[0.41-2.47]0.993  |
| From working                                            | 25(65.79)     | 13(34.21)     |                    | 2.39[1.15-4.97]0.019*  | 2.06[0.78-5.41]0.143  |
| Gift                                                    | 3(60)         | 2(40)         |                    | 3.07[0.50-18.83]0.226  | 4.57[0.37-56.13]0.235 |
| <b>Exposure to substance by friends (n=415)</b>         |               |               |                    |                        |                       |
| No                                                      | 101(90.99)    | 10(9.01)      | 9.88(0.002)**      | <b>ref</b>             | <b>ref</b>            |

|                                                   |            |           |               |                        |                       |
|---------------------------------------------------|------------|-----------|---------------|------------------------|-----------------------|
| Yes                                               | 235(77.3)  | 69(22.7)  |               | 2.97[1.47-5.99]0.002** | 2.34[1.03-5.32]0.043* |
| <b>Exposure to substance by family (n=415)</b>    |            |           |               |                        |                       |
| No                                                | 147(88.02) | 20(11.98) |               | <b>ref</b>             | <b>ref</b>            |
| Yes                                               | 189(76.21) | 59(23.79) | 9.04(0.003)** | 2.29[1.32-3.98]0.003** | 1.78[0.95-3.35]0.073  |
| <b>Social media exposure to substance (n=415)</b> |            |           |               |                        |                       |
| Yes                                               | 139(81.29) | 32(18.71) |               | <b>ref</b>             | <b>ref</b>            |
| No                                                | 197(80.74) | 47(19.26) | 0.02(0.889)   | 1.04[0.63-1.71]0.889   | 1.13[0.64-2.01]0.671  |
| <b>level of access to substance use (n=415)</b>   |            |           |               |                        |                       |
| High access                                       | 189(81.12) | 44(18.88) |               | <b>ref</b>             | <b>ref</b>            |
| Low access                                        | 147(80.77) | 35(19.23) | 0.008(0.929)  | 1.02[0.62-1.68]0.929   | 1.07[0.60-1.91]0.813  |
| <b>Self-esteem (n=415)</b>                        |            |           |               |                        |                       |
| High esteem                                       | 149(81.87) | 33(18.13) |               | <b>ref</b>             | <b>ref</b>            |
| Low esteem                                        | 183(79.91) | 46(20.09) | 1.20(0.548)   | 1.17[0.71-1.91]0.546   | 0.90[0.51-1.60]0.724  |
| <b>Perception on substance use (n=415)</b>        |            |           |               |                        |                       |
| High                                              | 89(82.41)  | 19(17.59) |               | <b>ref</b>             | <b>ref</b>            |
| Low                                               | 152(79.58) | 39(20.42) | 0.45(0.799)   | 1.20[0.65-2.21]0.554   | 1.25[0.62-2.51]0.538  |
| Average                                           | 95(81.9)   | 21(18.1)  |               | 1.04[0.52-2.06]0.921   | 1.04[0.47-2.28]0.923  |

Note: Abbreviation: n=total number of samples involved as connected to a particular variable; cOR= crude odds ratio; aOR= adjusted odds ratio; CI=confidence interval; \*p<0.05; \*\*p<0.01

### **Personal characteristics, social and intrapersonal factors, and cigarette use**

The prevalence of cigarette smoking among the study population was 3.77% (n=15). Neither age group (AOR=0.70, 95% CI: 0.19-2.61, p=0.593) nor sex (AOR=1.14, 95% CI: 0.30-4.41, p=0.847) were significantly associated with smoking status (Table 4). Univariate analysis indicated that participants who worked while attending school were more likely to smoke (COR=3.11; 95% CI: 1.10-8.82, p=0.032). However, this association was not statistically significant in the adjusted model. Exposure to cigarette use by a family member was significantly associated with smoking (AOR=13.23, 95% CI: 1.63-107.35, p=0.016).



Table 4. Personal characteristics, social and intrapersonal factors, and cigarette use

| Socio-demographic                                       | Cigarette use         |                      | $\chi^2$ (p-value) | Logistic regression   |                       |
|---------------------------------------------------------|-----------------------|----------------------|--------------------|-----------------------|-----------------------|
|                                                         | No=383(96.23)<br>n(%) | Yes=15(3.77)<br>n(%) |                    | cOR[95%CI] p-value    | aOR[95%CI] p-value    |
| <b>Age group (n=394)</b>                                |                       |                      |                    |                       |                       |
| ≤16                                                     | 116(96.67)            | 4(3.33)              | 0.11(0.745)        | <b>ref</b>            | <b>ref</b>            |
| 17+                                                     | 263(95.99)            | 11(4.01)             |                    | 1.21[0.38-3.89]0.746  | 0.70[0.19-2.61]0.593  |
| <b>Sex (n=397)</b>                                      |                       |                      |                    |                       |                       |
| Female                                                  | 224(96.97)            | 7(3.03)              | 0.85(0.356)        | <b>ref</b>            | <b>ref</b>            |
| Male                                                    | 158(95.18)            | 8(4.82)              |                    | 1.62[0.58-4.57]0.361  | 1.14[0.30-4.41]0.847  |
| <b>Form (n=397)</b>                                     |                       |                      |                    |                       |                       |
| SHS 2                                                   | 170(96.59)            | 6(3.41)              | 0.12(0.731)        | <b>ref</b>            | <b>ref</b>            |
| SHS 1                                                   | 212(95.93)            | 9(4.07)              |                    | 1.20[0.42-3.45]0.731  | 1.19[0.33-4.25]0.789  |
| <b>Religious affiliation (n=391)</b>                    |                       |                      |                    |                       |                       |
| Muslim                                                  | 57(96.61)             | 2(3.39)              | 0.007(0.932)       | <b>ref</b>            | <b>ref</b>            |
| Christian                                               | 320(96.39)            | 12(3.61)             |                    | 1.07[0.23-4.91]0.932  | 0.82[0.16-4.33]0.818  |
| <b>Whom do you live with (n=392)</b>                    |                       |                      |                    |                       |                       |
| Only father                                             | 35(94.59)             | 2(5.41)              | 6.22(0.285)        | <b>ref</b>            | <b>ref</b>            |
| Only mother                                             | 103(94.5)             | 6(5.5)               |                    | 1.02[0.20-5.30]0.982  | 0.62[0.12-3.19]0.563  |
| Both parents                                            | 99(94.29)             | 6(5.71)              | 6.22(0.285)        | 1.06[0.20-5.52]0.944  | 0.81[0.15-4.32]0.809  |
| Both parents and siblings                               | 90(100)               | 0(0.0)               |                    | -                     | -                     |
| Relatives                                               | 45(97.83)             | 1(2.17)              | 5.04(0.025)*       | 0.39[0.03-4.48]0.449  | 0.37[0.01-15.60]0.603 |
| Live alone                                              | 5(100)                | 0(0.0)               |                    | -                     | -                     |
| <b>Working apart from schooling (n=395)</b>             |                       |                      |                    |                       |                       |
| No                                                      | 278(97.54)            | 7(2.46)              | 5.04(0.025)*       | <b>ref</b>            | <b>ref</b>            |
| Yes                                                     | 102(92.73)            | 8(7.27)              |                    | 3.11[1.10-8.82]0.032* | 3.36[0.72-15.68]0.123 |
| <b>Where participant get pocket money from? (n=391)</b> |                       |                      |                    |                       |                       |
| Parents                                                 | 282(96.25)            | 11(3.75)             | 2.85(0.416)        | <b>ref</b>            | <b>ref</b>            |
| Guardians                                               | 56(98.25)             | 1(1.75)              |                    | 0.46[0.06-3.63]0.459  | 0.29[0.04-2.06]0.214  |
| From working                                            | 33(91.67)             | 3(8.33)              | 2.85(0.416)        | 2.33[0.62-8.80]0.212  | 0.93[0.21-4.03]0.920  |
| Gift                                                    | 5(100)                | 0(0.0)               |                    | -                     | -                     |
| <b>Exposure to substance by friends (n=398)</b>         |                       |                      |                    |                       |                       |

|                                                   |            |          |              |                        |                          |
|---------------------------------------------------|------------|----------|--------------|------------------------|--------------------------|
| No                                                | 105(97.22) | 3(2.78)  | 0.40(0.526)  | <b>ref</b>             | <b>ref</b>               |
| Yes                                               | 278(95.86) | 12(4.14) |              | 1.51[0.42-5.47]0.53    | 1.33[0.23-7.62]0.749     |
| <b>Exposure to substance by family (n=398)</b>    |            |          |              |                        |                          |
| No                                                | 158(98.75) | 2(1.25)  |              | <b>ref</b>             | <b>ref</b>               |
| Yes                                               | 225(94.54) | 13(5.46) | 4.68(0.031)* | 4.56[1.01-20.55]0.048* | 13.23[1.63-107.35]0.016* |
| <b>Social media exposure to substance (n=398)</b> |            |          |              |                        |                          |
| Yes                                               | 160(96.97) | 5(3.03)  | 0.42(0.515)  | <b>ref</b>             | <b>ref</b>               |
| No                                                | 223(95.71) | 10(4.29) |              | 1.43[0.48-4.28]0.518   | 1.49[0.40-5.50]0.554     |
| <b>Level of access to substance use (n=398)</b>   |            |          |              |                        |                          |
| High access                                       | 219(97.77) | 5(2.23)  | 3.34(0.068)  | <b>ref</b>             | <b>ref</b>               |
| Low access                                        | 164(94.25) | 10(5.75) |              | 2.67[0.89-7.97]0.078   | 2.23[0.67-7.47]0.192     |
| <b>Self-esteem (n=398)</b>                        |            |          |              |                        |                          |
| High esteem                                       | 171(97.16) | 5(2.84)  | 0.98(0.614)  | <b>ref</b>             | <b>ref</b>               |
| Low esteem                                        | 208(95.41) | 10(4.59) |              | 1.68[0.56-5.02]0.351   | 0.83[0.21-3.32]0.794     |
| <b>Perception on substance use (n=398)</b>        |            |          |              |                        |                          |
| High                                              | 100(99.01) | 1(0.99)  |              | <b>ref</b>             | <b>ref</b>               |
| Low                                               | 175(95.11) | 9(4.89)  | 2.92(0.232)  | 5.14[0.64-41.30]0.123  | 4.96[0.42-58.05]0.202    |
| Average                                           | 108(95.58) | 5(4.42)  |              | 4.63[0.53-40.42]0.166  | 3.95[0.30-51.73]0.295    |

Note: Abbreviation: n=total number of samples involved as connected to a particular variable; cOR= crude odds ratio; aOR= adjusted odds ratio; CI=confidence interval; \*p<0.05

### Personal characteristics, social and intrapersonal factors, and shisha use

The prevalence of shisha use among participants was 12.59% (n=51). Several factors were found to be significantly associated with shisha use, including age, employment status while attending school, source of pocket money, and shisha use among family and friends (p<0.01).

Univariate analyses revealed significant associations between several factors and shisha use (Table 5). Participants who earned their pocket money through work were three times more likely to use shisha than those who received pocket money from parents (COR=3.32, 95% CI: 1.46-7.53, p=0.004). Additionally, respondents with a family member who used shisha were more than twice as likely to use shisha themselves (COR=2.39, 95% CI: 1.21-4.72, p=0.012).

Participants with a low perception of the consequences of shisha use were also more likely to use shisha compared to those with a higher perception (COR=2.65, 95% CI: 1.12-6.27, p=0.027). Age was another significant factor, with participants aged 17 years and above being more likely to use shisha than those aged 16 and below (AOR=2.42, 95% CI: 1.10-5.31, p=0.028). Finally, respondents with friends who smoked shisha were three times more likely to use it themselves (AOR=3.35, 95% CI: 1.20-9.34, p=0.021).

Table 5. Personal characteristics, social and intrapersonal factors, and shisha use

| Socio-demographic        | Shisha use    |               | $\chi^2$ (p-value) | Logistic regression   |                       |
|--------------------------|---------------|---------------|--------------------|-----------------------|-----------------------|
|                          | No=354(87.41) | Yes=51(12.59) |                    | cOR[95%CI] p-value    | aOR[95%CI] p-value    |
|                          | n(%)          | n(%)          |                    |                       |                       |
| <b>Age group (n=400)</b> |               |               |                    |                       |                       |
| ≤16                      | 115(93.5)     | 8(6.5)        | 6.23(0.013)*       | <b>ref</b>            | <b>ref</b>            |
| 17+                      | 234(84.48)    | 43(15.52)     |                    | 2.64[1.20-5.81]0.016* | 2.42[1.10-5.31]0.028* |

|                                                         |            |           |                |  |                        |                       |
|---------------------------------------------------------|------------|-----------|----------------|--|------------------------|-----------------------|
| <b>Sex (n=404)</b>                                      |            |           |                |  |                        |                       |
| Female                                                  | 211(89.79) | 24(10.21) |                |  | <b>ref</b>             | <b>ref</b>            |
| Male                                                    | 142(84.02) | 27(15.98) | 2.96(0.085)    |  | 1.67[0.93-3.02]0.088   | 0.99[0.48-2.01]0.968  |
| <b>Form (n=404)</b>                                     |            |           |                |  |                        |                       |
| SHS 2                                                   | 157(89.2)  | 19(10.8)  |                |  | <b>ref</b>             | <b>ref</b>            |
| SHS 1                                                   | 196(85.96) | 32(14.04) | 0.95(0.331)    |  | 1.35[0.74-2.47]0.333   | 1.65[0.79-3.42]0.181  |
| <b>Religious affiliation (n=398)</b>                    |            |           |                |  |                        |                       |
| Muslim                                                  | 53(89.83)  | 6(10.17)  |                |  | <b>ref</b>             | <b>ref</b>            |
| Christian                                               | 296(87.32) | 43(12.68) | 0.29(0.587)    |  | 1.28[0.52-3.17]0.589   | 1.31[0.45-3.86]0.622  |
| <b>Whom do you live with (n=399)</b>                    |            |           |                |  |                        |                       |
| Only father                                             | 28(75.68)  | 9(24.32)  |                |  | <b>ref</b>             | <b>ref</b>            |
| Only mother                                             | 95(84.82)  | 17(15.18) |                |  | 0.56[0.22-1.39]0.208   | 0.54[0.18-1.65]0.280  |
| Both parents                                            | 99(91.67)  | 9(8.33)   |                |  | 0.28[0.10-0.78]0.015*  | 0.31[0.09-1.08]0.066  |
| Both parents and siblings                               | 82(90.11)  | 9(9.89)   | 8.72(0.121)    |  | 0.34[0.12-0.95]0.039*  | 0.37[0.11-1.24]0.107  |
| Relatives                                               | 42(91.3)   | 4(8.7)    |                |  | 0.30[0.08-1.06]0.061   | 0.31[0.08-1.24]0.097  |
| Live alone                                              | 4(80)      | 1(20)     |                |  | 0.78[0.08-7.91]0.832   | 0.81[0.08-8.64]0.859  |
| <b>Working apart from schooling (n=402)</b>             |            |           |                |  |                        |                       |
| No                                                      | 263(90.38) | 28(9.62)  |                |  | <b>ref</b>             | <b>ref</b>            |
| Yes                                                     | 88(79.28)  | 23(20.72) | 8.93(0.003)**  |  | 2.45[1.34-4.49]0.003** | 1.64[0.74-3.64]0.221  |
| <b>Where participant get pocket money from? (n=398)</b> |            |           |                |  |                        |                       |
| Parents                                                 | 269(89.97) | 30(10.03) |                |  | <b>ref</b>             | <b>ref</b>            |
| Guardians                                               | 48(84.21)  | 9(15.79)  |                |  | 1.68[0.75-3.77]0.207   | 1.52[0.60-3.90]0.380  |
| From working                                            | 27(72.97)  | 10(27.03) | 12.52(0.006)** |  | 3.32[1.46-7.53]0.004** | 1.73[0.59-5.07]0.318  |
| Gift                                                    | 3(60)      | 2(40)     |                |  | 5.98[0.96-37.30]0.056  | 3.41[0.43-27.31]0.248 |
| <b>Exposure to substance by friends (n=405)</b>         |            |           |                |  |                        |                       |
| No                                                      | 104(95.41) | 5(4.59)   |                |  | <b>ref</b>             | <b>ref</b>            |
| Yes                                                     | 250(84.46) | 46(15.54) | 8.68(0.003)**  |  | 3.83[1.48-9.92]0.006** | 3.35[1.20-9.34]0.021* |
| <b>Exposure to substance by family (n=405)</b>          |            |           |                |  |                        |                       |
| No                                                      | 150(92.59) | 12(7.41)  |                |  | <b>ref</b>             | <b>ref</b>            |
| Yes                                                     | 204(83.95) | 39(16.05) | 6.59(0.010)**  |  | 2.39[1.21-4.72]0.012*  | 1.89[0.87-4.18]0.108  |
| <b>Social media exposure to substance (n=405)</b>       |            |           |                |  |                        |                       |
| Yes                                                     | 151(89.88) | 17(10.12) | 1.59(0.206)    |  | <b>ref</b>             | <b>ref</b>            |

|                                                 |            |           |             |                       |                      |
|-------------------------------------------------|------------|-----------|-------------|-----------------------|----------------------|
| No                                              | 203(85.65) | 34(14.35) |             | 1.49[0.80-2.77]0.209  | 1.84[0.90-3.74]0.093 |
| <b>Level of access to substance use (n=405)</b> |            |           |             |                       |                      |
| High access                                     | 202(88.6)  | 26(11.4)  | 0.67(0.413) | <b>ref</b>            | <b>ref</b>           |
| Low access                                      | 152(85.88) | 25(14.12) |             | 1.28[0.71-2.30]0.414  | 1.21[0.63-2.33]0.569 |
| <b>Self-esteem (n=405)</b>                      |            |           |             |                       |                      |
| High esteem                                     | 161(90.45) | 17(9.55)  | 3.50(0.174) | <b>ref</b>            | <b>ref</b>           |
| Low esteem                                      | 189(84.75) | 34(15.25) |             | 1.75[0.94-3.24]0.078  | 1.26[0.63-2.51]0.511 |
| <b>Perception on substance use (n=405)</b>      |            |           |             |                       |                      |
| High                                            | 97(93.27)  | 7(6.73)   |             | <b>ref</b>            | <b>ref</b>           |
| Low                                             | 157(83.96) | 30(16.04) | 5.28(0.071) | 2.65[1.12-6.27]0.027* | 2.29[0.89-5.93]0.087 |
| Average                                         | 100(87.72) | 14(12.28) |             | 1.94[0.75-5.02]0.172  | 2.23[0.77-6.43]0.139 |

Note: Abbreviation: n=total number of samples involved as connected to a particular variable; cOR= crude odds ratio; aOR= adjusted odds ratio; CI=confidence interval; \*p<0.05; \*\*p<0.01

### Personal characteristics, social and intrapersonal factors, and marijuana use

The prevalence of the use of marijuana among participants was 30 (7.5%). From the multivariate analysis, factors associated with marijuana use include family exposure (AOR=3.66, 95% CI: 1.21-11.03, p=0.021) and non-exposure to social media (AOR=5.80, 95% CI:1.84-18.28, p=0.003). Respondents who live with parents and siblings (AOR=0.14, 95% CI: 0.03-0.60, P=0.008) were less likely to use marijuana as opposed to those who live with only their father (Table 6).

Table 6. Personal characteristics, social and intrapersonal factors, and marijuana use

| Socio-demographic        | Marijuana use         |                      | $\chi^2$ (p-value) | Logistic regression |                    |
|--------------------------|-----------------------|----------------------|--------------------|---------------------|--------------------|
|                          | No=370(92.50)<br>n(%) | Yes=30(7.50)<br>n(%) |                    | cOR[95%CI] p-value  | aOR[95%CI] p-value |
| <b>Age group (n=396)</b> |                       |                      |                    |                     |                    |

|                                                         |            |           |                |                        |                        |
|---------------------------------------------------------|------------|-----------|----------------|------------------------|------------------------|
| ≤16                                                     | 115(94.26) | 7(5.74)   |                | <b>ref</b>             | <b>ref</b>             |
| 17+                                                     | 251(91.61) | 23(8.39)  | 0.85(0.356)    | 1.51[0.63-3.61]0.360   | 1.21[0.44-3.36]0.714   |
| <b>Sex (n=399)</b>                                      |            |           |                |                        |                        |
| Female                                                  | 222(95.69) | 10(4.31)  |                | <b>ref</b>             | <b>ref</b>             |
| Male                                                    | 147(88.02) | 20(11.98) | 8.21(0.004)**  | 3.02[1.37-6.64]0.006** | 2.60[0.97-6.99]0.057   |
| <b>Form (n=399)</b>                                     |            |           |                |                        |                        |
| SHS 2                                                   | 161(92)    | 14(8)     |                | <b>ref</b>             | <b>ref</b>             |
| SHS 1                                                   | 208(92.86) | 16(7.14)  | 0.10(0.747)    | 0.88[0.42-1.87]0.748   | 0.89[0.36-2.22]0.808   |
| <b>Religious affiliation (n=393)</b>                    |            |           |                |                        |                        |
| Muslim                                                  | 56(94.92)  | 3(5.08)   |                | <b>ref</b>             | <b>ref</b>             |
| Christian                                               | 311(93.11) | 23(6.89)  | 0.26(0.608)    | 1.38[0.40-4.76]0.610   | 0.80[0.25-2.59]0.711   |
| <b>Whom do you live with (n=394)</b>                    |            |           |                |                        |                        |
| Only father                                             | 31(83.78)  | 6(16.22)  |                | <b>ref</b>             | <b>ref</b>             |
| Only mother                                             | 99(90)     | 11(10)    |                | 0.57[0.20-1.68]0.311   | 0.35[0.09-1.35]0.128   |
| Both parents                                            | 101(94.39) | 6(5.61)   |                | 0.31[0.09-1.02]0.054   | 0.21[0.04-1.09]0.064   |
| Both parents and siblings                               | 86(96.63)  | 3(3.37)   | 15.82(0.007)** | 0.18[0.04-0.77]0.020*  | 0.14[0.03-0.60]0.008** |
| Relatives                                               | 44(95.65)  | 2(4.35)   |                | 0.23[0.04-1.24]0.089   | 0.25[0.04-1.55]0.136   |
| Live alone                                              | 3(60)      | 2(40)     |                | 3.44[0.47-25.30]0.224  | 3.19[0.39-26.01]0.278  |
| <b>Working apart from schooling (n=397)</b>             |            |           |                |                        |                        |
| No                                                      | 272(94.44) | 16(5.56)  |                | <b>ref</b>             | <b>ref</b>             |
| Yes                                                     | 95(87.16)  | 14(12.84) | 6.01(0.014)*   | 2.51[1.18-5.33]0.017*  | 2.45[0.75-7.99]0.137   |
| <b>Where participant get pocket money from? (n=393)</b> |            |           |                |                        |                        |
| Parents                                                 | 275(93.22) | 20(6.78)  |                | <b>ref</b>             | <b>ref</b>             |
| Guardians                                               | 53(92.98)  | 4(7.02)   |                | 1.04[0.34-3.16]0.948   | 0.60[0.17-2.17]0.437   |
| From working                                            | 31(86.11)  | 5(13.89)  | 3.42(0.332)    | 2.22[0.78-6.33]0.137   | 0.29[0.04-2.02]0.211   |
| Gift                                                    | 4(80)      | 1(20)     |                | 3.44[0.37-32.31]0.280  | 2.98[0.10-86.56]0.525  |
| <b>Exposure to substance by friends (n=400)</b>         |            |           |                |                        |                        |
| No                                                      | 106(98.15) | 2(1.85)   |                | <b>ref</b>             | <b>ref</b>             |
| Yes                                                     | 264(90.41) | 28(9.59)  | 6.80(0.009)**  | 5.62[1.31-24.06]0.020* | 4.38[0.48-39.95]0.191  |
| <b>Exposure to substance by family (n=400)</b>          |            |           |                |                        |                        |
| No                                                      | 155(96.27) | 6(3.73)   |                | <b>ref</b>             | <b>ref</b>             |
| Yes                                                     | 215(89.96) | 24(10.04) | 5.53(0.019)*   | 2.88[1.15-7.23]0.024*  | 3.66[1.21-11.03]0.021* |

|                                                   |            |           |               |  |                         |                         |
|---------------------------------------------------|------------|-----------|---------------|--|-------------------------|-------------------------|
| <b>Social media exposure to substance (n=400)</b> |            |           |               |  |                         |                         |
| Yes                                               | 161(96.99) | 5(3.01)   |               |  | <b>ref</b>              | <b>ref</b>              |
| No                                                | 209(89.32) | 25(10.68) | 8.24(0.004)** |  | 3.85[1.44-10.30]0.007** | 5.80[1.84-18.28]0.003** |
| <b>level of access to substance use (n=400)</b>   |            |           |               |  |                         |                         |
| High access                                       | 205(91.11) | 20(8.89)  |               |  | <b>ref</b>              | <b>ref</b>              |
| Low access                                        | 165(94.29) | 10(5.71)  | 1.43(0.232)   |  | 0.62[0.28-1.37]0.236    | 0.51[0.19-1.31]0.160    |
| <b>Self-esteem (n=400)</b>                        |            |           |               |  |                         |                         |
| High esteem                                       | 167(94.89) | 9(5.11)   |               |  | <b>ref</b>              | <b>ref</b>              |
| Low esteem                                        | 199(90.45) | 21(9.55)  | 3.09(0.213)   |  | 2.01[0.89-4.50]0.092    | 1.84[0.73-4.59]0.194    |
| <b>Perception on substance use (n=400)</b>        |            |           |               |  |                         |                         |
| High                                              | 94(92.16)  | 8(7.84)   |               |  | <b>ref</b>              | <b>ref</b>              |
| Low                                               | 168(90.81) | 17(9.19)  | 2.32(0.314)   |  | 1.19[0.49-2.86]0.699    | 1.16[0.41-3.26]0.778    |
| Average                                           | 108(95.58) | 5(4.42)   |               |  | 0.54[0.17-1.72]0.300    | 0.85[0.22-3.30]0.813    |

Note: Abbreviation: n=total number of samples involved as connected to a particular variable; cOR= crude odds ratio; aOR= adjusted odds ratio; CI=confidence interval; \*p<0.05; \*\*p<0.01

### Substance use dependence

Substance use dependence was assessed using a scale ranging from 0 (no dependence) to 4 (high dependence), with a score of two or higher indicating significant dependence. As shown in Table 7, a substantial proportion of alcohol users (62.03%, n=49) met the criteria for alcohol dependence, while the remaining 37.97% (n=30) did not. Among marijuana users, 66.67% (n=20) demonstrated dependence on the substance. Shisha dependence was notably high, with 80.36% (n=41) of shisha users meeting the criteria for dependence. In contrast, cigarette dependence was observed in 46.67% of cigarette users.

Table 7. Substance use dependence

| Variable | Type of substance use dependence |  |  |  |  |  |
|----------|----------------------------------|--|--|--|--|--|
|----------|----------------------------------|--|--|--|--|--|

|                              | Alcohol   |                 |       | Cigarette |                 |       | Shisha    |                 |       | Marijuana |                 |       |
|------------------------------|-----------|-----------------|-------|-----------|-----------------|-------|-----------|-----------------|-------|-----------|-----------------|-------|
|                              | Yes (2-4) | No ( $\leq 1$ ) | Total | Yes (2-4) | No ( $\leq 1$ ) | Total | Yes (2-4) | No ( $\leq 1$ ) | Total | Yes (2-4) | No ( $\leq 1$ ) | Total |
|                              | n(%)      | n(%)            |       | n(%)      | n(%)            |       | n(%)      | n(%)            |       | n(%)      | n(%)            |       |
| Overall                      | 49(62.03) | 30(37.97)       | 79    | 7(46.67)  | 8(53.33)        | 15    | 41(80.36) | 10(19.61)       | 51    | 20(66.67) | 10(33.33)       | 30    |
| <b>Age group</b>             |           |                 |       |           |                 |       |           |                 |       |           |                 |       |
| $\leq 16$                    | 13(59.09) | 9(40.91)        | 22    | 2(50.00)  | 2(50.00)        | 4     | 7(87.50)  | 1(12.50)        | 8     | 4(57.14)  | 3(42.86)        | 7     |
| 17+                          | 36(63.16) | 21(36.84)       | 57    | 5(45.45)  | 6(54.55)        | 11    | 34(79.07) | 9(20.93)        | 43    | 16(69.57) | 7(30.43)        | 23    |
| Total                        | 49(62.03) | 30(37.97)       | 79    | 7(46.67)  | 8(53.33)        | 15    | 41(80.39) | 10(19.61)       | 51    | 20(66.67) | 10(33.33)       | 30    |
| <b>Sex</b>                   |           |                 |       |           |                 |       |           |                 |       |           |                 |       |
| Male                         | 28(62.22) | 17(37.78)       | 45    | 4(50.00)  | 4(50.00)        | 8     | 24(88.89) | 3(11.11)        | 27    | 14(70.00) | 6(30.00)        | 20    |
| Female                       | 21(61.76) | 13(38.24)       | 34    | 3(42.86)  | 4(57.14)        | 7     | 17(70.83) | 7(29.17)        | 24    | 6(60.00)  | 4(40.00)        | 10    |
| Total                        | 49(62.03) | 30(37.97)       | 79    | 7(46.67)  | 8(53.33)        | 15    | 41(80.39) | 10(19.61)       | 51    | 20(66.67) | 10(33.33)       | 30    |
| <b>Form</b>                  |           |                 |       |           |                 |       |           |                 |       |           |                 |       |
| SHS 1                        | 35(64.81) | 19(35.19)       | 54    | 3(33.33)  | 6(66.67)        | 9     | 26(81.25) | 6(18.75)        | 32    | 12(75.00) | 4(25.00)        | 16    |
| SHS 2                        | 14(58.33) | 10(41.67)       | 24    | 4(66.67)  | 2(33.33)        | 6     | 15(78.95) | 4(21.05)        | 19    | 8(57.14)  | 6(42.86)        | 14    |
| Total                        | 49(62.82) | 29(37.18)       | 78    | 7(46.67)  | 8(53.33)        | 15    | 41(80.39) | 10(19.61)       | 51    | 20(66.67) | 10(33.33)       | 30    |
| <b>Religious affiliation</b> |           |                 |       |           |                 |       |           |                 |       |           |                 |       |
| Christian                    | 45(63.38) | 26(36.62)       | 71    | 5(41.67)  | 7(58.33)        | 12    | 35(81.40) | 8(18.60)        | 43    | 14(60.87) | 9(39.13)        | 23    |
| Muslim                       | 3(42.86)  | 4(57.14)        | 7     | 1(50.00)  | 1(50.00)        | 2     | 4(66.67)  | 2(33.33)        | 6     | 3(100.00) | 0(0.00)         | 3     |
| Total                        | 48(61.54) | 30(38.46)       | 78    | 6(42.86)  | 8(57.14)        | 14    | 39(79.59) | 10(20.41)       | 49    | 17(65.38) | 9(34.62)        | 26    |



## 311 **Discussion**

312 This study examined substance use patterns and their correlates among Ghanaian in-school  
313 adolescents. We found that cigarettes, marijuana, shisha, and alcohol were the primary  
314 substances used by participants. This aligns with findings from Chile, where cigarettes, alcohol,  
315 and cannabis were common among adolescents (33). However, alcohol was the most prevalent  
316 substance in our study, contrasting with an Iranian review that identified cigarettes and hookah  
317 (shisha) as the most common (34). Notably, our alcohol prevalence was lower than the 34.63%  
318 observed among adolescents in 47 European countries (35), potentially due to their larger,  
319 cross-national sample compared to our two-school study and regional differences between  
320 settings.

321 Marijuana prevalence in our study (7.5%) exceeded the 3.4% found in a Ghanaian study using  
322 2012 Global School-Based Student Health Survey data (14,36), but was lower than the 9%  
323 reported among junior high school students (37). These variations may stem from differences  
324 in sample size and the number of schools involved.

325

326 Shisha use prevalence (12.59%) was higher than the 10.3% observed in Ghanaian urban slums  
327 and communities (20), yet lower than the 13.4% reported among Sudanese youth (38). These  
328 discrepancies likely reflect the distinct study settings and populations. This high prevalence is  
329 concerning, given the potential negative consequences of substance use on these students and  
330 the association of high school shisha use with deviant behaviours (39).

331

332 Our study's cigarette use prevalence (3.77%) was lower than the 11.1% reported in Nigeria  
333 (40). This might be attributed to setting differences and the global decline in tobacco  
334 consumption (12). Friends, online/social media, markets, and drug peddlers were identified as  
335 sources of these substances. The influence of peers and the lack of enforcement of existing

336 policies and regulations likely contribute to the availability of these substances among high  
337 school students (20).

338  
339 Our study confirmed the association between various personal characteristics, social, and  
340 intrapersonal factors, and substance use. Alcohol use was more prevalent among males,  
341 aligning with previous studies in Morocco and Ethiopia (41,42). Further, living with relatives  
342 and having friends who consume alcohol were significant predictors, emphasizing the  
343 importance of peer influence and social networks in adolescent substance use (Bondah et al.,  
344 2020; Henneberger et al., 2021; Osaki et al., 2018; Quiroga et al., 2018; Reda et al., 2012).

345  
346 While sex was not significantly associated with cigarette use in our study, it was in a Nigerian  
347 study (40). Although peer use is often a reliable indicator, we found no association, contrasting  
348 a study in Ethiopia that found a significant association with having smoker friends and parents  
349 (47). However, our finding of a significant association with family exposure to cigarette use  
350 aligns with their results.

351  
352 Age was associated with shisha smoking, consistent with a Lebanese study (48), but not with  
353 studies in Sudan and the UK (38,49). We found more boys smoked shisha, though not  
354 significantly, contrasting a Lebanese study finding more girls (50). This discrepancy could be  
355 due to differing social contexts and gendered expectations (51).

356  
357 Our study aligns with (52) in finding family and friend shisha use as predictors. While initially  
358 significant, low perception of consequences became insignificant after controlling for other  
359 factors, contrasting a Canadian study where low perception increased the odds of shisha use  
360 (53). This could be due to misconceptions about shisha's harmfulness (8).

361

362 Finally, our study revealed significant associations between marijuana use and family  
363 exposure, non-exposure to social media, and living with both parents and siblings, echoing the  
364 importance of family influence found in Moroccan and Northern Irish studies (54,55). While  
365 initially significant, being male, peer exposure, and working alongside schooling became  
366 insignificant after adjustment, contrasting studies linking these factors to marijuana use  
367 (18,37). This could be due to our study's smaller sample size compared to larger studies finding  
368 age, low self-esteem, and substance availability as significant predictors (6,56).

369  
370 The current study revealed a notable prevalence of substance dependence among students who  
371 reported using various substances. Specifically, we observed high rates of dependence on  
372 alcohol (62.03%), shisha (80.36%), and marijuana (66.67%), while dependence on cigarettes  
373 was comparatively lower (46.67%). This lower rate of cigarette dependence aligns with reports  
374 of decreased cigarette smoking in Ghana (57).

375  
376 Our findings echo previous research indicating substance dependence among adolescents and  
377 young adults. Similar patterns of marijuana and alcohol dependence in 12th-grade students  
378 have been found in a previous study (58). Furthermore, studies conducted in diverse  
379 geographical contexts, such as Egypt (59,60) Jordan (61), and Romania (62), have consistently  
380 demonstrated substance dependence among student populations, particularly with regard to  
381 tobacco.

382  
383 Taken together, these findings underscore the global nature of substance dependence among  
384 students and highlight the need for targeted interventions and prevention strategies aimed at  
385 reducing substance use and associated harms in this vulnerable population.

386

387 **Limitations of the study**

388

389 This study has several limitations. The exclusion of Senior High School 3 (SHS 3) students  
390 may underestimate the prevalence and associated factors of substance use. Reliance on self-  
391 reporting could lead to underreporting due to social desirability and recall bias. The cross-  
392 sectional design also prevents establishing causality. Future research should include a wider  
393 age range, use a longitudinal design, and incorporate objective measures of substance use to  
394 address these limitations.

395

396 **Conclusion**

397 This study found that substance use is prevalent among senior high school students in the Accra  
398 Metropolitan Area. Cigarettes, marijuana, shisha, and alcohol are the most commonly used  
399 substances, with varying prevalence rates. The primary source of these substances is friends,  
400 suggesting that students are bringing them to school without the knowledge of authorities.

401

402 Several socio-demographic factors, including substance use among friends and family, as well  
403 as sex, are associated with substance use among students. Notably, males are more likely to  
404 use substances compared to females.

405

406 Furthermore, a significant proportion of students who use substances exhibit signs of  
407 dependence. This is particularly evident in SHS 1 students for most substances, except  
408 cigarettes. Additionally, males and students older than 17 years are more likely to be dependent  
409 on these substances.

410

411 These findings underscore the need for targeted interventions and prevention programs to  
412 address substance use and dependence among senior high school students in the Accra  
413 Metropolitan Area. Further research is needed to explore the underlying reasons for substance

414 use, the impact of dependence, and the effectiveness of various prevention and intervention  
415 strategies.

416

## 417 **Acknowledgments**

418 Our sincere appreciation goes to the school authorities who permitted this study to be  
419 conducted in their schools and the students who participated in the study. Without them this  
420 study would not have been possible.

421

## 422 **References**

- 423 1. Hamidullah S, Thorpe HHA, Frie JA, Mccurdy RD, Khokhar JY. Adolescent  
424 substance use and the brain: behavioral, cognitive and neuroimaging correlates. *Front*  
425 *Hum Neurosci.* 2020;14:517606.
- 426 2. Ogundipe O, Amoo EO, Adeloye D, Olawole-Isaac A. Substance use among  
427 adolescents in sub-Saharan Africa: A systematic review and meta-analysis. *South*  
428 *African Journal of Child Health.* 2018;2018(1):s79–84.
- 429 3. Shafi A, Berry AJ, Sumnall H, Wood DM, Tracy DK. New psychoactive substances: a  
430 review and updates. *Ther Adv Psychopharmacol.* 2020;10:2045125320967197.
- 431 4. Earnshaw VA. Stigma and substance use disorders: A clinical, research, and advocacy  
432 agenda. *American Psychologist.* 2020;75(9):1300.
- 433 5. Dhawan A, Mishra AK, Ambekar A, Chatterjee B, Agrawal A, Bhargava R.  
434 Estimating the size of substance using street children in Delhi using Respondent-  
435 Driven Sampling (RDS). *Asian J Psychiatr.* 2020;48:101890.
- 436 6. Glozah FN. Exploring the role of self-esteem and parenting patterns on alcohol use and  
437 abuse among adolescents. *Health Psych Res.* 2014 Oct;
- 438 7. Jamatia B. Prevalence of alcohol intake and illegal drugs among the students at  
439 English medium private schools of Tripura, India (North Eastern States of India).  
440 *Indian journal of community medicine.* 2022;47(4):618–21.
- 441 8. United Nations Office on Drugs and Crime. *World drug report 2021.* 2021.
- 442 9. Jumbe S, Kamninga TM, Mwalwimba I, Kalu UG. Determinants of adolescent  
443 substance use in Africa: a systematic review and meta-analysis protocol. *Syst Rev.*  
444 2021;10(1):125.
- 445 10. Lees B, Meredith LR, Kirkland AE, Bryant BE, Squeglia LM. Effect of alcohol use on  
446 the adolescent brain and behavior. *Pharmacol Biochem Behav.* 2020;192:172906.
- 447 11. Glozah FN, Komesuor J. University students' alcohol use behaviour and self-efficacy  
448 to abstain from alcohol use: Data from Ghana. *BMC Res Notes.* 2019;12(1).
- 449 12. World Health Organization. *Global status report on alcohol and health and treatment*  
450 *of substance use disorders.* 2024.
- 451 13. Organization WH. *The impact of COVID-19 on mental, neurological and substance*  
452 *use services: results of a rapid assessment.* 2020;
- 453 14. Tetteh J, Nuertey BD, Dwomoh D, Udofia EA, Mohammed S, Adjei-Mensah E, et al.  
454 *Teenage pregnancy and experience of physical violence among women aged 15-19*  
455 *years in five African countries: Analysis of complex survey data.* *PLoS One [Internet].*  
456 2020;15(10 October):1–18. Available from:  
457 <http://dx.doi.org/10.1371/journal.pone.0241348>

- 458 15. Nelson EU, Obot I. Beyond prohibition: responses to illicit drugs in West Africa in an  
459 evolving policy context. *Drugs Alcohol Today*. 2020;20(2):123–33.
- 460 16. Tetteh J, Ekem-Ferguson G, Quarshie ENB, Swaray SM, Ayanore MA, Seneadza  
461 NAH, et al. Marijuana use and suicidal behaviours among school-going adolescents in  
462 Africa: assessments of prevalence and risk factors from the Global School-Based  
463 Student Health Survey. *Gen Psychiatr*. 2021;34(4).
- 464 17. Kugbey N. Prevalence and correlates of substance use among school-going  
465 adolescents (11-18years) in eight Sub-Saharan Africa countries. *Subst Abuse Treat  
466 Prev Policy*. 2023;18(1):44.
- 467 18. Oppong Asante K. Cannabis and amphetamine use and its psychosocial correlates  
468 among school-going adolescents in Ghana. *Child Adolesc Psychiatry Ment Health*.  
469 2019;13:1–9.
- 470 19. Glozah FN, Komesuor J, Adu NAT, Aggrey FK. The role of alcohol abstinence self-  
471 efficacy in alcohol use: A cross-sectional survey of Ghanaian undergraduate students.  
472 *Afr J Drug Alcohol Stud*. 2017;16(1).
- 473 20. Logo DD, Kyei-Faried S, Oppong FB, Ansong J, Amenyaglo S, Ankrah ST, et al.  
474 Waterpipe use among the youth in Ghana: Lessons from the Global Youth Tobacco  
475 Survey (GYTS) 2017. *Tob Induc Dis*. 2020;18.
- 476 21. Ghana Food and Drugs Authority. FDA launches “Daabi-Say no to drug abuse”  
477 campaign in Achimota School [Internet]. 2022 [cited 2022 Jul 13]. Available from:  
478 <http://www.fdaghana.gov.gh/news-media.php?page=135>
- 479 22. Scuri S, Petrelli F, Tesauro M, Carrozzo F, Kracmarova L, Grappasonni I. Energy  
480 drink consumption: a survey in high school students and associated psychological  
481 effects. *J Prev Med Hyg*. 2018;59(1):E75.
- 482 23. Hall W, Leung J, Lynskey M. The effects of cannabis use on the development of  
483 adolescents and young adults. *Annu Rev Dev Psychol*. 2020;2(1):461–83.
- 484 24. Trucco EM. A review of psychosocial factors linked to adolescent substance use.  
485 *Pharmacol Biochem Behav*. 2020;196:172969.
- 486 25. Nawi AM, Ismail R, Ibrahim F, Hassan MR, Manaf MRA, Amit N, et al. Risk and  
487 protective factors of drug abuse among adolescents: a systematic review. *BMC Public  
488 Health*. 2021;21:1–15.
- 489 26. Carver H, Elliott L, Kennedy C, Hanley J. Parent–child connectedness and  
490 communication in relation to alcohol, tobacco and drug use in adolescence: An  
491 integrative review of the literature. *Drugs: education, prevention and policy*.  
492 2017;24(2):119–33.
- 493 27. Zimmerman GM, Farrell C. Parents, peers, perceived risk of harm, and the  
494 neighborhood: Contextualizing key influences on adolescent substance use. *J Youth  
495 Adolesc*. 2017;46:228–47.
- 496 28. Rusby JC, Light JM, Crowley R, Westling E. Influence of parent–youth relationship,  
497 parental monitoring, and parent substance use on adolescent substance use onset.  
498 *Journal of family psychology*. 2018;32(3):310.
- 499 29. Stockings E, Bartlem K, Hall A, Hodder R, Gilligan C, Wiggers J, et al.  
500 Whole-of-community interventions to reduce population-level harms arising from  
501 alcohol and other drug use: a systematic review and meta-analysis. *Addiction*.  
502 2018;113(11):1984–2018.
- 503 30. Jackson KM, Janssen T, Gabrielli J. Media/marketing influences on adolescent and  
504 young adult substance abuse. *Curr Addict Rep*. 2018;5:146–57.
- 505 31. Davis JP, Pedersen ER, Tucker JS, Dunbar MS, Seelam R, Shih R, et al. Long-term  
506 associations between substance use-related media exposure, descriptive norms, and  
507 alcohol use from adolescence to young adulthood. *J Youth Adolesc*. 2019;48:1311–26.

- 508 32. Jumbe S, Kamninga TM, Mwalwimba I, Kalu UG. Determinants of adolescent  
509 substance use in Africa: a systematic review and meta-analysis protocol. *Syst Rev*.  
510 2021 Dec 1;10(1).
- 511 33. Gaete J, Tornero B, Valenzuela D, Rojas-Barahona CA, Salmivalli C, Valenzuela E, et  
512 al. Substance use among adolescents involved in bullying: A cross-sectional multilevel  
513 study. *Front Psychol*. 2017 Jun 28;8(JUN).
- 514 34. Nahvizadeh MM, Akhavan S, Arti S, Qaraat L, Geramian N, Farajzadegan Z, et al. A  
515 Review Study of Substance Abuse Status in High School Students, Isfahan, Iran  
516 [Internet]. *International Journal of Preventive Medicine*. 2014. Available from:  
517 [www.ijpm.ir](http://www.ijpm.ir)
- 518 35. Cosma A, Bjereld Y, Elgar FJ, Richardson C, Bilz L, Craig W, et al. Gender  
519 Differences in Bullying Reflect Societal Gender Inequality: A Multilevel Study With  
520 Adolescents in 46 Countries. *Journal of Adolescent Health*. 2022 Nov 1;71(5):601–8.
- 521 36. Tetteh J, Ekem-Ferguson G, Swaray SM, Kugbey N, Quarshie ENB, Yawson AE.  
522 Marijuana use and repeated attempted suicide among senior high school students in  
523 Ghana: Evidence from the WHO Global School-Based Student Health Survey, 2012.  
524 *Gen Psychiatr*. 2020;33(6).
- 525 37. Hormenu T, John Elvis HJnr, Thomas S, Dietmar P. Psychosocial Determinants of  
526 Marijuana Utilization among Selected Junior High School Students in the Central  
527 Region of Ghana. *Journal of Preventive Medicine And Care*. 2018 Aug 9;43–57.
- 528 38. Othman M, Aghamohammadi N, Nik Farid ND. Determinants of shisha use among  
529 secondary school students in Sudan. *BMC Public Health*. 2019 Oct 28;19(1).
- 530 39. Parimah F, Davour MJ, Tetteh C, Okyere-Twum E. Shisha Use Is Associated with  
531 Deviance among High School Students in Accra, Ghana. *Journal of Psychoactive  
532 Drugs*. 2022;54(1):54–60.
- 533 40. Fagbule OF, Kanmodi KK, Samuel VO, Isola TO, Aliemeke EO, Ogbeide ME, et al.  
534 Prevalence and predictors of cigarette smoking and alcohol use among secondary  
535 school students in Nigeria. *Ann Ib Postgrad Med*. 2021;19(2):112–23.
- 536 41. Ben El Jilali L, Benazzouz B, El Hessni A, Ouichou A, Mesfioui A. Prevalence of  
537 alcohol consumption and alcohol use disorders among middle and high school students  
538 in the province of Khemisset, Morocco: a cross-sectional study. *Int J Adolesc Youth*.  
539 2020;25(1):638–48.
- 540 42. Reda AA, Moges A, Wondmagegn BY, Biadgilign S. Alcohol drinking patterns  
541 among high school students in Ethiopia: a cross-sectional study. *BMC Public Health*.  
542 2012;12:1–6.
- 543 43. Henneberger AK, Mushonga DR, Preston AM. Peer influence and adolescent  
544 substance use: A systematic review of dynamic social network research. *Adolesc Res  
545 Rev*. 2021;6(1):57–73.
- 546 44. Quiroga E, Pinto-Carral A, García I, Molina AJ, Fernández-Villa T, Martín V. The  
547 influence of adolescents' social networks on alcohol consumption: A descriptive study  
548 of Spanish adolescents using social network analysis. *Int J Environ Res Public Health*.  
549 2018;15(9):1795.
- 550 45. Bondah E, Gren L, Talboys S. Prevalence, drinking patterns, and risk factors of  
551 alcohol use and early onset among Ghanaian senior high school students. *Am J Prev  
552 Med*. 2020;6(1):16–25.
- 553 46. Osaki H, Mshana G, Mbata D, Kapiga S, Changalucha J. Social space and alcohol use  
554 initiation among youth in northern Tanzania. *PLoS One*. 2018;13(9):e0202200.
- 555 47. Roble AK, Osman MO, Lathwal OP, Aden AA. Prevalence of cigarette smoking and  
556 associated factors among adolescents in eastern Ethiopia, 2020. *Subst Abuse Rehabil*.  
557 2021;73–80.

- 558 48. Jawad M, Charide R, Waziry R, Darzi A, Ballout RA, Akl EA. The prevalence and  
559 trends of waterpipe tobacco smoking: A systematic review. *PLoS One*.  
560 2018;13(2):e0192191.
- 561 49. Jawad M, Power G. Prevalence, correlates and patterns of waterpipe smoking among  
562 secondary school students in southeast London: a cross-sectional study. *BMC Public*  
563 *Health*. 2015;16:1–6.
- 564 50. Akel M, Sakr F, Fahs I, Dimassi A, Dabbous M, Ehlinger V, et al. Smoking behavior  
565 among adolescents: the Lebanese experience with cigarette smoking and Waterpipe  
566 use. *Int J Environ Res Public Health*. 2022;19(9):5679.
- 567 51. Cheng HG, Anthony JC. A new era for drinking? Epidemiological evidence on  
568 adolescent male–female differences in drinking incidence in the United States and  
569 Europe. *Soc Psychiatry Psychiatr Epidemiol*. 2017;52:117–26.
- 570 52. Jallow IK, Britton J, Langley T. Prevalence and determinants of tobacco use among  
571 young people in The Gambia. *BMJ Glob Health*. 2017;2(4):e000482.
- 572 53. Minaker LM, Shuh A, Burkhalter RJ, Manske SR. Hookah use prevalence, predictors,  
573 and perceptions among Canadian youth: findings from the 2012/2013 Youth Smoking  
574 Survey. *Cancer Causes & Control*. 2015;26:831–8.
- 575 54. El Kazdoun H, El-Ammari A, Bouftini S, El Fakir S, El Achhab Y. Adolescents,  
576 parents and teachers’ perceptions of risk and protective factors of substance use in  
577 Moroccan adolescents: a qualitative study. *Subst Abuse Treat Prev Policy*. 2018;13:1–  
578 12.
- 579 55. McLaughlin A, Campbell A, McColgan M. Adolescent substance use in the context of  
580 the family: A qualitative study of young people’s views on parent-child attachments,  
581 parenting style and parental substance use. *Subst Use Misuse*. 2016;51(14):1846–55.
- 582 56. Andrade C. Sample size and its importance in research. *Indian J Psychol Med*.  
583 2020;42(1):102–3.
- 584 57. Singh A, Owusu-Dabo E, Mdege N, McNeill A, Britton J, Bauld L. A situational  
585 analysis of tobacco control in Ghana: progress, opportunities and challenges. *J Glob*  
586 *Health Rep*. 2020;4.
- 587 58. Luk JW, King KM, McCarty CA, McCauley E, Stoep A Vander. Prospective effects of  
588 parenting on substance use and problems across Asian/Pacific Islander and European  
589 American youth: tests of moderated mediation. *J Stud Alcohol Drugs*. 2017;78(4):521–  
590 30.
- 591 59. Rabie M, Shaker NM, Gaber E, El-Habiby M, Ismail D, El-Gaafary M, et al.  
592 Prevalence updates of substance use among Egyptian adolescents. *Middle East current*  
593 *psychiatry*. 2020;27:1–8.
- 594 60. Shalaby SF, Soliman MA. Knowledge, attitude, and practice of medical students  
595 regarding smoking and substance abuse, Cairo University, Egypt. *Journal of the*  
596 *Egyptian Public Health Association*. 2019;94:1–9.
- 597 61. Khatatbeh MM, Alkhalidi S, Khader Y, Momani W, Al Omari O, Kheirallah K, et al.  
598 Prevalence of nicotine dependence among university students in Jordan: a cross-  
599 sectional study. *Epidemiol Biostat Public Health*. 2019;16(2).
- 600 62. Dumitrescu AL, Ibric S, Ibric-Cioranu V. Opinions of Romanian dental students  
601 toward tobacco use interventions in the dental setting. *Journal of Cancer Education*.  
602 2016;31(1):172–80.
- 603  
604  
605  
606
